# Supplementary material for: Creation of Philadelphia chromosome by CRISPR/Cas9-mediated double cleavages on BCR and ABL1 genes as a model for initial event in leukemogenesis
Source: Cancer Gene Ther. 2022 Aug 23;30(1):38–50. doi: 10.1038/s41417-022-00522-w (PMC9842507; doi:10.1038/s41417-022-00522-w)
Supplement: Supplementary file 9 — Supplement Table 1 [file 41417_2022_522_MOESM9_ESM.xlsx]

## Sheet: Sheet1
Supplement Table 1. gRNA sequences
	Forward	Reverse
gRNA BCR intron13	CACCGTGCCCTGTACACGGAAACGG	AAACCCGTTTCCGTGTACAGGGCAC
gRNA BCR intron1	CACCGCCTTTCCACGTGGAAGGCCG	AAACCGGCCTTCCACGTGGAAAGGC
gRNA ABL1 intron1	CACCGCCTCTGGTGTCAGCTGACCC	AAACGGGTCAGCTGACACCAGAGGC
