# Supplementary material for: Creation of Philadelphia chromosome by CRISPR/Cas9-mediated double cleavages on BCR and ABL1 genes as a model for initial event in leukemogenesis
Source: Cancer Gene Ther. 2022 Aug 23;30(1):38–50. doi: 10.1038/s41417-022-00522-w (PMC9842507; doi:10.1038/s41417-022-00522-w)
Supplement: Supplementary file 10 — Supplement Table 2 [file 41417_2022_522_MOESM10_ESM.xlsx]

## Sheet: Sheet1
Supplement Table 2. RT-PCR primers
	Forward	Reverse
genomic DNA BCR-ABL1 (p210)	ATGCTGACCAACTCGTGTGT	GTCAGCCTGCTAATACCCACA
genomic DNA BCR-ABL1 (p190)	TGGGACGAGAAGTGGAGAAC	AGTCAGCCTGCTAATACCCA
genomic DNA ABL1-BCR (p210)	CAGGCCGTGAATACAATTAGGC	AACTGCTCCTAACCCACCTTG
genomic DNA ABL1-BCR (p190)	AAATACCATGAGGGTGGGGAG	CAGAGGTGACCTTGGTGTTCA
BCR exon 13 ABL1 exon 7	AGCATTCCGCTGACCATCAA	TCTCCCCTACCAGGCAGTTT
BCR exon 1 ABL1 exon 2	GCTCCAATGAGAACCTCACCT	CCCTGAGGCTCAAAGTCAGAT
ABL1 exon 6 ABL1 exon 7	CTGCTGTACATGGCCACTCA	CTCTCGGGTGCAGTCCATTT
