# Supplementary material for: Creation of Philadelphia chromosome by CRISPR/Cas9-mediated double cleavages on BCR and ABL1 genes as a model for initial event in leukemogenesis
Source: Cancer Gene Ther. 2022 Aug 23;30(1):38–50. doi: 10.1038/s41417-022-00522-w (PMC9842507; doi:10.1038/s41417-022-00522-w)
Supplement: Supplementary file 11 — Supplement Table 3 [file 41417_2022_522_MOESM11_ESM.xlsx]

## Sheet: Sheet1
Supplement Table 3. Real-time RT-PCR primers
	Fluorescence	Forward	Reverse
ACTBP2	NED	AATCTGGGCGCACAAGAGTGA	ACATCTCCCCTACCGCTATA
HGH	VIC	TCCAGCCTCGGAGACAGAAT	AGTCCTTTCTCCAGAGCAGGT
D3S1359	PET	ATGCTAAGTGCTAAGTCAACT	GTTGCCTCTGACATGGCTTT
D18S51	6-FAM	TTCTTGAGCCCAGAAGGTTA	ATTCTACCAGCAACAACACAAATAAAC
