# Supplementary material for: Creation of Philadelphia chromosome by CRISPR/Cas9-mediated double cleavages on BCR and ABL1 genes as a model for initial event in leukemogenesis
Source: Cancer Gene Ther. 2022 Aug 23;30(1):38–50. doi: 10.1038/s41417-022-00522-w (PMC9842507; doi:10.1038/s41417-022-00522-w)
Supplement: Supplementary file 12 — Supplement Table 4 [file 41417_2022_522_MOESM12_ESM.xlsx]

## Sheet: Sheet1
Supplement Table 4. Antibodies used in this research
Antibodies	Host species	Source	Catalog #
anti-ABL1	Mouse	BD Biosciences, Franklin Lakes, NJ, USA	#554148
anti-STAT5	Mouse	BD Transduction Laboratories, Lexington, KY, USA	#610192
anti-phospho-STAT5 (Tyr694)	Rabbit	Cell Signaling Technologies, Beverly, MA, USA	#9351
anti-p44/42 MAPK	Rabbit	Cell Signaling Technologies, Beverly, MA, USA	#9102
anti-phospho-p44/42 MAPK (Thr202/Tyr204)	Rabbit	Cell Signaling Technologies, Beverly, MA, USA	#9101
anti-p70 S6K	Rabbit	Cell Signaling Technologies, Beverly, MA, USA	#9202
anti-phospho-p70 S6K (Thr421/Ser424)	Rabbit	Cell Signaling Technologies, Beverly, MA, USA	#9204
anti-a-Tubulin	Mouse	Sigma, St. Louis, MO, USA	#T5168
anti-beta-actin	Mouse	Sigma, St. Louis, MO, USA	#A5441
anti-mouse IgG(H+L chain)-peroxidase	Goat	MBL, Nagoya, Japan	#330
anti-Rabbit IgG(H+L chain)-peroxidase	Goat	MBL, Nagoya, Japan	#458
