# Supplementary material for: Creation of Philadelphia chromosome by CRISPR/Cas9-mediated double cleavages on BCR and ABL1 genes as a model for initial event in leukemogenesis
Source: Cancer Gene Ther. 2022 Aug 23;30(1):38–50. doi: 10.1038/s41417-022-00522-w (PMC9842507; doi:10.1038/s41417-022-00522-w)
Supplement: Supplementary file 14 — Supplement Table 6 [file 41417_2022_522_MOESM14_ESM.xlsx]

## Sheet: Up_gene_Meta
Supplement Table 6. Significant genes in GM+ parental cells and two sublines
Upregulated (250)	Downregulated (116)
MLLT11	CD36
GATA2	CA1
UBASH3B	ALAS2
APOL4	PIGQ
PKM	ESPN
LCP2	TFRC
ETV4	ADD2
HMGCS1	EPOR
INSIG1	FAM210B
BCL2L1	SPTA1
ST3GAL4	RNASE1
ME1	COL18A1
MSMO1	CAT
PALM2-AKAP2	TRIB2
WNT11	SLC4A1
PHGDH	ERMAP
CFH	MFSD2B
IL1B	GYPA
DDIT4	PRDX2
CD300A	HBZ
ARHGAP15	ALAD
VEGFA	CTSE
SCD	LGALS3
ETV5	AHSP
VDR	FAXDC2
TNFRSF8	EPB42
LAT	GLRX
BHLHE40	HEMGN
KIF21B	ATF5
ANKRD55	GPT
CORO2A	TLCD4
PTGIR	HBD
PLA2G3	TAX1BP3
SLC18A2	PPOX
OSM	CAPN5
SLC6A6	HMBS
CD3D	LRRC7
CD68	DHRS13
YES1	TSPAN17
SH3BP1	SDC4
SLC39A14	ZDHHC14
UNC5B	NHLRC4
SEC24D	HBB
GRAP2	PHOSPHO1
FASN	HES2
GGT5	KIT
DBN1	BTG2
TTC7B	SPNS2
ADCYAP1	IRF6
LIF	MGST3
ITGA5	TRIM29
CCR4	LTBP1
SIGLEC12	AQP1
TOX2	FAM178B
GIPC3	SNX22
S100A16	SLC16A9
MYO1G	GYPE
PRG2	GP1BB
TMEM108	TNFRSF19
MAGED1	GYPB
AEBP1	AGFG2
PDP2	SGK1
LRP8	TUBB1
CASTOR1	SLC25A21
ARHGAP30	RFESD
GK	ACHE
GJA1	CITED4
SLC38A1	ZNF69
MT1X	REPS2
VEPH1	SQOR
SH3PXD2B	KRT13
PRF1	MAMLD1
SLCO4C1	TMEM184A
SOCS1	ACKR1
GRIK5	LOXL4
LGALS12	FN3K
PLCH1	EDNRB
ADM2	CREB3L3
ITGAX	TTLL11
TMSB4X	TMEM72
DENND3	SMIM5
CHAC1	CLIC3
GJA5	FXYD3
PDE2A	ARHGAP23
SLC4A7	CD40LG
PIK3R5	ELF3
BEGAIN	PLLP
LAT2	ARMC9
COL6A5	ARPP21
RAB44	ENPP2
CCDC136	CRYBG1
IL1A	ST6GALNAC2
ARAP3	DNAJA4
LRRN3	FAM110D
NDRG2	DGKB
NKG7	SLC38A5
SPARC	RTBDN
ARHGEF40	ART4
RIN1	CRB2
TRERF1	ARG1
RTN4RL2	APC2
RAB33A	POU3F2
P3H3	HSPA12B
DENND1C	CYP3A5
HOMER3	FHDC1
SH2D2A	SOWAHC
FRMD3	SEC14L3
ENO2	ACE2
ARHGEF25	HLA-DQA1
MAFF	MYO5B
FOXB1	CELA2A
RHOB	TRIM68
PLA2G6	PCOTH
DUSP6	KLHDC8A
TSPAN15	GRHL3
ZC3H12C	AK8
ARG2
SPRED1
OLIG2
NPPC
SPRY4
DNAJB5
IL10RA
AHR
SLC45A3
F12
GPR3
SIGLEC6
LPAR2
LOXL2
RAB3B
INHBE
SLC15A3
CACNA1I
GBP5
SH2D5
SYT3
MPZ
NR5A2
NTS
SLC9A5
RUNX2
ASIC1
B4GALNT4
LGALSL
SHANK1
GIPR
FGF2
AAK1
CA5B
PORCN
RHEBL1
SDC1
HIST1H2BH
RAB11FIP4
BTN2A2
FOXA2
ARHGAP20
GJB2
KCNE3
CDH23
NES
CD22
AFP
BRSK1
RCOR2
NRP1
DAPK2
ETV1
LRRC4B
ADAM11
PLEKHN1
CBS
NKD1
PDLIM2
CACNB1
DNHD1
ANGPTL2
GPC2
TGM5
ULBP1
GPR132
MCC
SEMA4A
EMX2
RSKR
SRRM3
DACT3
ADAP1
ADAMTS19
PRUNE2
HES7
PTPRD
DIRAS3
FCGR2B
TAFA2
RFLNB
STX1B
FLVCR2
SCN4A
MAP4K1
NXPH4
ZBTB7C
PTP4A3
DUSP13
CD79B
CNIH2
HCK
FOXA3
CD69
VLDLR
TMEM154
CLEC10A
SEMA3F
SIGLEC14
ELFN2
RASSF4
CORO6
ADGRG3
SERTM2
USH1G
LPAR1
TEPP
GRIN2C
MTMR11
TSC22D3
GPR162
IL17RE
CYP2J2
APBB1
TMPRSS13
AIF1
DUSP4
ADAMTS4
CCDC116
TMEM269
CIB3
HCN1
HSD17B14
SIRPB1
GNA14
EFEMP2
KRT15
LIMCH1
CFHR1
CCDC9B
MYEOV
SYT17
GLIS2
PSD2
