# Supplementary material for: Creation of Philadelphia chromosome by CRISPR/Cas9-mediated double cleavages on BCR and ABL1 genes as a model for initial event in leukemogenesis
Source: Cancer Gene Ther. 2022 Aug 23;30(1):38–50. doi: 10.1038/s41417-022-00522-w (PMC9842507; doi:10.1038/s41417-022-00522-w)
Supplement: Supplementary file 15 — Supplement Table 7 [file 41417_2022_522_MOESM15_ESM.xlsx]

## Sheet: Up_gene_Meta
Supplement Table 7. Significant genes in sublines
p210 upregulated (391)	p190 upregulated (174)
IGF2BP1	AKR1C1
PTPRCAP	GPR153
MAGEA3	ST8SIA6
CPNE1	CA1
SFRP5	ZFP36L2
VIM	ESPN
SLC44A2	SLC6A19
MAGEA12	AKR1C2
MPL	AKR1C3
SRC	HIST1H1C
CSAG1	CD36
ABLIM1	SLC6A8
CDH2	ALAS2
ITGAM	ACSBG1
TEAD4	PCGF5
APLP1	HIST1H2BK
PTPRF	PKP3
CD93	DES
ANXA3	ACPP
MMRN1	FAM178B
NXF3	HBB
GATM	HMBS
PLEKHA6	CLCA1
PTK7	SELENBP1
MYO5C	EIF1AY
ENAH	GALNT5
PODXL	ITGB4
JAK3	GPT
KCNK17	NFE4
TNIK	MXD1
PLD4	COX6B2
TEK	RBM47
SERPING1	HEMGN
BEX1	TACC2
SLFN11	SPIN4
PROCR	AHSP
EPAS1	SEC14L2
COL2A1	LDHD
OGFRL1	HBG2
FREM1	SLC4A1
VASH1	DYSF
ADRA1D	ADD2
ZBTB16	SDC4
LIN28B	SOX21
BIN1	KYNU
TUSC3	PRSS8
ENC1	EVPL
TRAF3IP3	HIST1H2AC
NCALD	HES2
F8	CAPRIN2
DEPTOR	GRAP2
PTAFR	TMPRSS4
SOX8	DDHD1
GALNT14	NFIA
SLA2	PTH2R
SGCZ	GNLY
PERP	IGFBP7
ADAM11	MYRF
NPDC1	SLC26A2
DUSP5	TPSAB1
PIEZO2	GLRX
LY75	TUBB1
MERTK	LOC100506422
PPM1L	TRIM29
FYN	CDH12
ENPP4	DDX60L
IFI16	TPSG1
RNF157	AZGP1
B4GALNT3	PRKD1
DAB2	DMTN
LRP3	APOL1
SLA	SNX22
GP9	CST7
TMEM170B	MLXIPL
PLEKHA7	AGFG2
PRTG	RNF182
PTPN14	FAM83A
LAMB1	ACHE
TM4SF1	HPN
LMCD1	C5AR2
WLS	MT1G
OGDHL	FMO5
IL6R	ALDH3B1
TMEM132A	ZNF165
C1orf21	SNX20
IFIT1	HBE1
PALD1	OSGIN1
MAP1B	HIST1H2BJ
MYO5A	MAGEC2
RAB3C	SHISA7
ADAMTS19	GDF15
TERT	STXBP6
GPX8	KLF15
GNB5	NMNAT3
KIRREL2	NHLRC4
PLA2G3	ENTHD1
TP53I11	SYDE2
CYFIP2	SH2D3A
SLFN5	HBG1
PDZD4	ABCA1
SH2D1B	TUBAL3
ADORA2A	IRAK2
ASIC4	ABCA8
GPR63	CLIC3
SLC16A9	TMEM229B
MECOM	FOXH1
TREML2	SLC6A9
C12orf75	LAMP3
SP9	NPTX1
PLEK	NOTUM
NOSTRIN	SQOR
KANK1	TGFB3
TBL1Y	KIAA0754
IRX3	C8G
CSAG3	CCR7
SLITRK5	MS4A2
IGF2BP2	DNAJA4
FRAS1	FAM155A
HOMER1	HSH2D
CALN1	GRHL1
SH3RF2	RAG2
C1orf226	OLFML2B
FMNL2	CREB3L1
DDX25	ZSCAN16
COL27A1	IL1RN
BRSK2	RGCC
CCDC173	WDR72
CFAP161	TM4SF19
FGD1	CACNA1I
ZNF607	IL1RAPL2
GP5	PIWIL2
PRTFDC1	C4A
COL6A2	DDX60
SAMHD1	ADAMTS4
PKDCC	THPO
LANCL3	MPP7
MAGEA2B	HIST1H3G
NAV1	C3
IGLON5	HYAL1
PRKG2	NYAP1
LRRC20	B3GNT8
DHRS9	YBX2
CRABP1	KRT13
TRPM2	KIF21A
BCL11A	GULP1
PPP1R14C	PRKACA
PTGDR2	IRF5
FEV	CTSE
LRRC4B	EIF5A
JAG2	YPEL4
TMEM37	SLC18B1
USH1C	TMEM14C
TTC39C	PCDH1
PTPRU	APLNR
KCNMB4	C2orf16
ASIC1	MRC2
APLN	RGL3
MAB21L1	TMPRSS15
TTLL10	HIST1H2BO
BEGAIN	CFAP43
SLC35G1	CXCR3
KCND1	SMIM5
COLGALT2	COL26A1
PRAM1	EDNRB
ETNK2	ST6GALNAC2
EGF	CHRD
COMMD8	C4B
SLC8A3	HIST1H2AL
ALDH7A1	ARHGAP23
THBS1	DDX53
MMRN2	DGAT1
DPYSL5	PCDHB5
RAB27B	SYNPO2L
CYP2J2	MYO6
RPS6KA2
EPB41L4A
SORT1
ARHGAP29
ITGA8
L3MBTL1
CDK18
ANKS1B
PLCE1
CHD5
SEPTIN10
SLCO3A1
MPP2
MAG
F2RL2
PFN2
ALOX5AP
GFI1
ARHGEF9
COL24A1
ASPHD1
FGFBP3
LINGO1
LHFPL6
DISC1
TTC8
RAB44
TRIM67
PGAP1
COBLL1
TGFB1I1
RARB
PXDC1
LMF1
MAFB
AFAP1
HAPLN3
STUM
WDR54
TSC22D3
TEX15
FSD1
CTF1
LOC400499
SUSD5
FAM50B
PCBP3
COL6A1
GPR85
SIGLEC5
LRRC6
MTX3
ZNF853
ABTB2
KLRG1
CKMT1A
TNFSF15
MEGF6
BMPER
MCC
RASGRP1
ADAM22
MVB12B
LRIG3
SCRT2
MYOF
LRATD1
RTKN2
OLFM2
NCCRP1
CD200R1
SLC2A13
L1CAM
MEIS1
CA14
ZNF488
TLCD5
ADH1C
NOS1AP
MED12L
CD48
A2M
CDON
B3GNT3
FBLN1
FGF13
PCOLCE2
COL21A1
EPB41L1
NFATC2
ATP10D
ITGB1BP2
PDE4B
JCAD
NEDD9
PADI4
C1RL
PTPN5
SARDH
IGFBP5
SMAD7
PRRT4
HECTD2
SOWAHC
ENTPD1
CNIH2
PDE6G
RUSC2
NGEF
GCNT4
ZNF793
NOTCH2NLC
DMXL2
PCSK1
ULBP2
PIWIL3
CBSL
TSNARE1
IFI44L
NKX3-2
NKX3-1
AFF3
EGR3
ROPN1L
GPRC5C
ITGB5
CDH5
CAPN11
COL6A6
AOC1
TMIGD2
KLK1
CCNO
CD1D
PCDH20
ZNF233
SIGLEC15
SULT1C2
LURAP1L
TRIM2
DACH1
ACVRL1
LSM2
PLEKHB1
CCL2
SCML1
KCNJ11
KLF7
C19orf38
SPX
NDUFS3
LIMCH1
ARHGEF28
GPR65
ADGRB3
PRR5L
HS3ST3A1
ST5
KIF17
CD300LF
GPRIN3
DHRS1
DLG3
NKPD1
CLMN
UNC5C
IQSEC3
SYT6
SGSM1
CBWD3
GPR35
SPEG
ZNF334
HEG1
FRK
LRP2
SEMA3A
GALNT3
WFDC1
KRT73
SARM1
ATXN1
CDA
RETN
TBR1
TRPC1
IL17RE
VSTM2L
DOCK10
BAMBI
NR5A1
IL3RA
ANKEF1
MPPED2
NRCAM
CRYBB1
RTN4R
EPHA2
RGS3
GJB2
AZIN2
FLACC1
ACTN3
FCER2
SMARCD3
GASK1A
EVI2A
TIGAR
TNR
KL
FUT6
SIGLEC9
GOLGA7B
EXTL1
RGL1
SLC1A3
MAPK10
